# Supplementary material
Source: publisher figshare collection journal article supplement (https://acs.figshare.com/ndownloader/files/8835688)
Supplement: Supplementary file 1 [file 8835688]

**Supplementary Materials to**  
**“Hydrate phase equilibrium of CH<sub>4</sub>+N<sub>2</sub>+CO<sub>2</sub> gas mixtures and cage**  
**occupancy behaviors”**

You-Hong Sun<sup>1</sup>, Sheng-Li Li<sup>1\*</sup>, Guo-Biao Zhang<sup>1</sup>, Wei Guo<sup>1</sup>, You-Hai Zhu<sup>2</sup>

1 Key Laboratory of Drilling and Exploitation Technology in Complex Conditions of Ministry of Land and Resources, College of Construction Engineering, Jilin University, Changchun, 130026, China

2 The Key Laboratory of Unconventional Petroleum Geology, Oil and Gas Survey, China Geological Survey, Beijing, 100029, China

**Corresponding information:**

Corresponding author: Sheng-Li Li

E-mail: [lishengli@jlu.edu.cn](mailto:lishengli@jlu.edu.cn) (S. L. Li).

Tel.: +86 431 88502678.

Fax: +86 431 88502678.

Postal Address: 938 Ximinzhu Street, Changchun, 130026, China.

---

\* To whom correspondence should be addressed. Fax: +86 431 88502678. E-mail: [lishengli@jlu.edu.cn](mailto:lishengli@jlu.edu.cn) (S. L. Li).

### Figure captions

Figure S1. The mole ratio of CH<sub>4</sub> in large cages and small cages ( $3x/\theta$ ) (calculated by CSMHYD program).

Figure S2. Relationship of values of  $\theta/x$  of N<sub>2</sub> and CO<sub>2</sub> molecules with temperature.

Figure S3. Occupancy ratios of N<sub>2</sub> and CO<sub>2</sub> in hydrate cages (calculated by CSMHYD program).

Figure S4. Mole ratios of N<sub>2</sub>/CO<sub>2</sub> in small and large cages(calculated by CSMHYD program).

Figure S5. Relative occupancies of CH<sub>4</sub>/N<sub>2</sub>/CO<sub>2</sub> in small cages (a), large cages (b) and hydrate cages(c) (calculated by CSMHYD program).

Figure S6. Variation of occupancy of CO<sub>2</sub> in large cages with the concentration of CH<sub>4</sub> in gas phase.

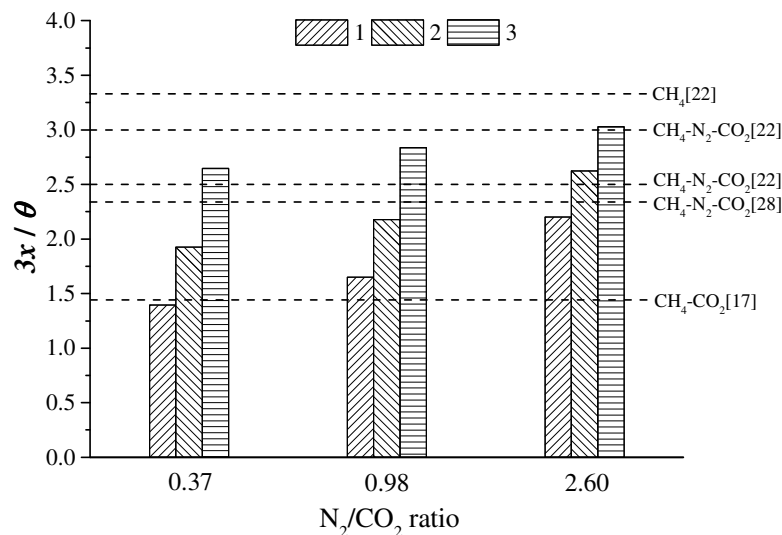

Figure S1. The mole ratio of CH<sub>4</sub> in large cages and small cages ( $3x/\theta$ ) (calculated by CSMHYD program) The numbers of 1, 2 and 3 respectively represent the CH<sub>4</sub> levels of 20%, 50% and 80% in each group with different N<sub>2</sub>/CO<sub>2</sub> ratios.

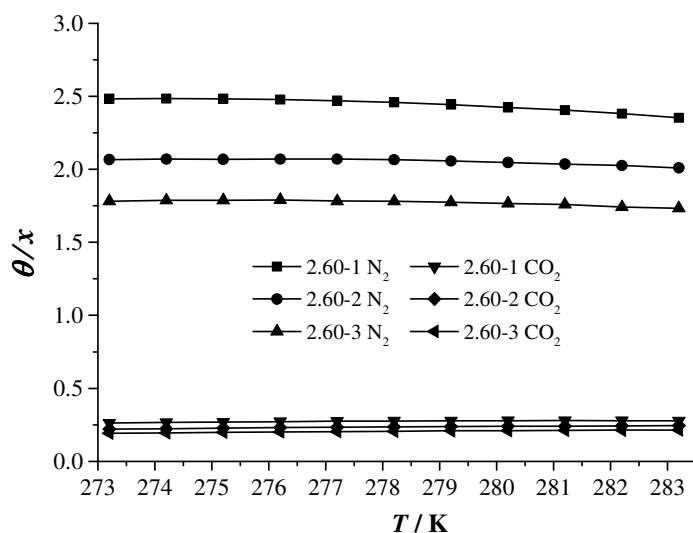

Figure S2. Relationship of values of  $\theta/x$  of N<sub>2</sub> and CO<sub>2</sub> molecules with temperature. The numbers of 1, 2 and 3 respectively represent the CH<sub>4</sub> levels of 20%, 50% and 80% in each group with different N<sub>2</sub>/CO<sub>2</sub> ratios.

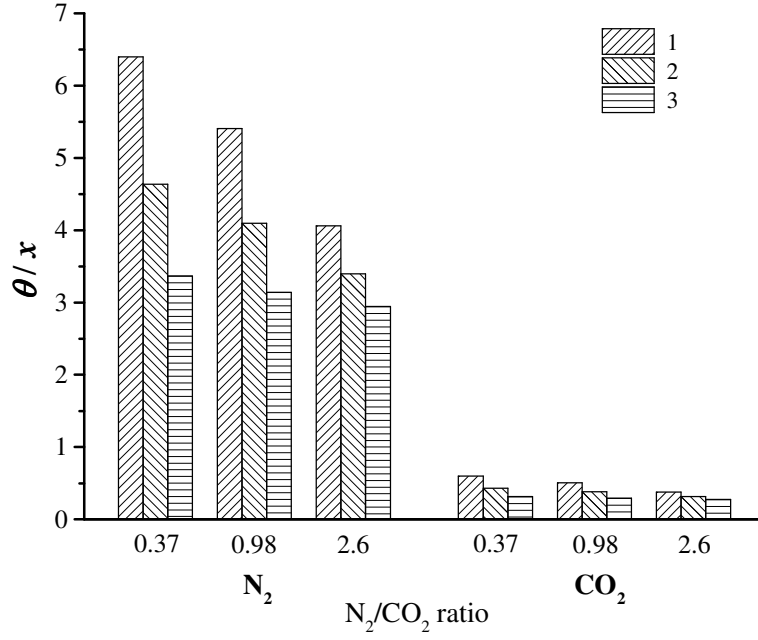

Figure S3. Occupancy ratios of  $N_2$  and  $CO_2$  in hydrate cages (calculated by CSMHYD program). The numbers of 1, 2 and 3 respectively represent the  $CH_4$  levels of 20%, 50% and 80% in each group with different  $N_2/CO_2$  ratios.

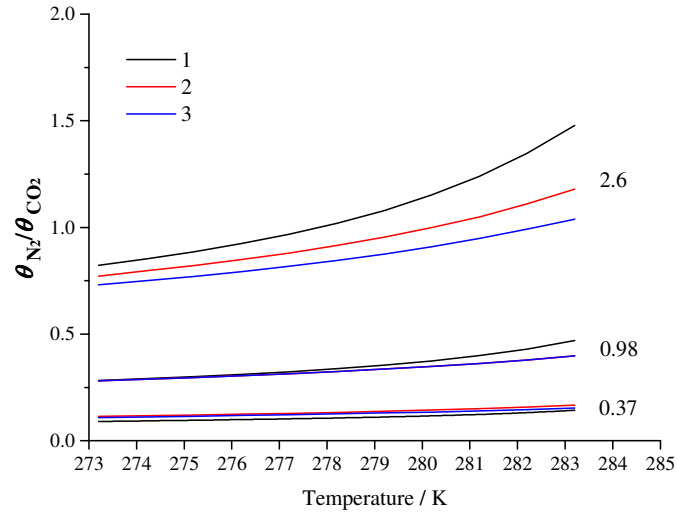

a. In small cage

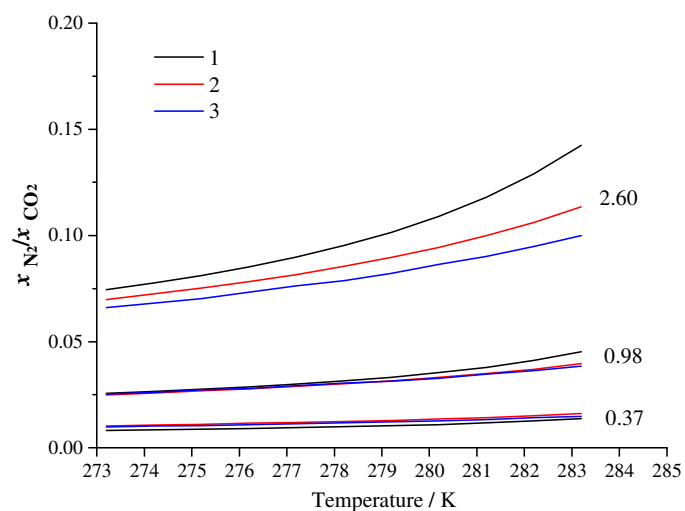

b. In large cage

Figure S4. Mole ratios of  $N_2/CO_2$  in small and large cages (calculated by CSMHYD program). The numbers of 1, 2 and 3 respectively represent the  $CH_4$  levels of 20%, 50% and 80% in each group with different  $N_2/CO_2$  ratios.

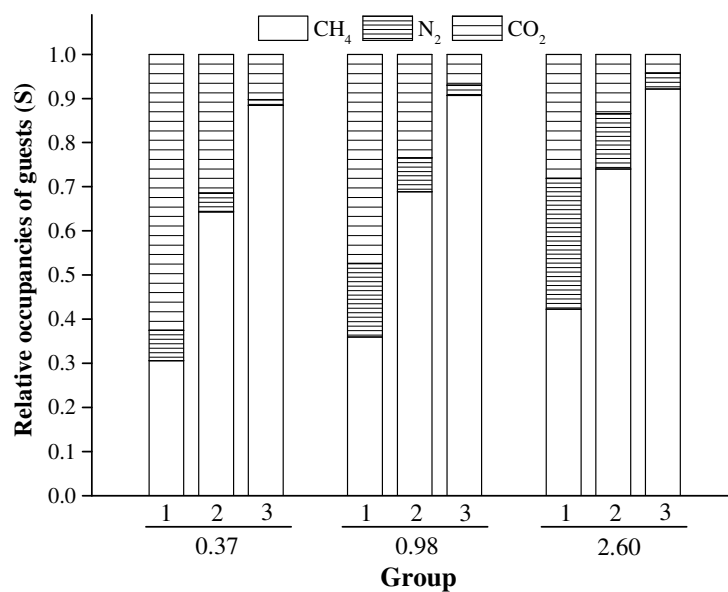

a. Small cage (S)

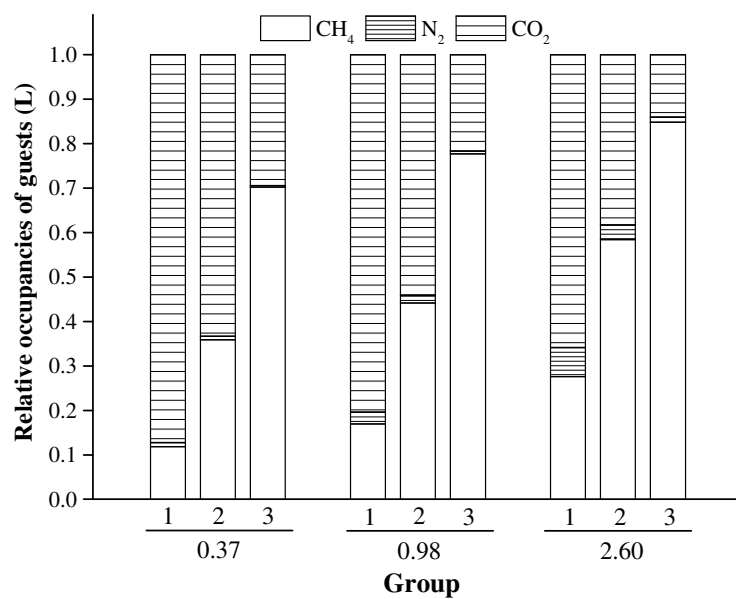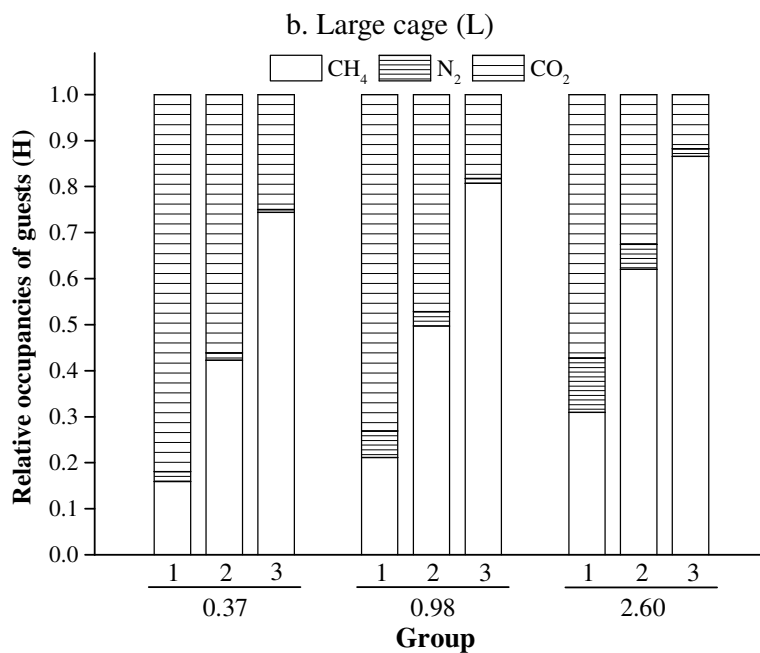

c. Hydrate cages (H)

Figure S5. Relative occupancies of  $\text{CH}_4/\text{N}_2/\text{CO}_2$  in small cages (a), large cages (b) and hydrate cages (c) (calculated by CSMHYD program). The numbers of 1, 2 and 3 respectively represent the  $\text{CH}_4$  levels of 20%, 50% and 80% in each group with different  $\text{N}_2/\text{CO}_2$  ratios.

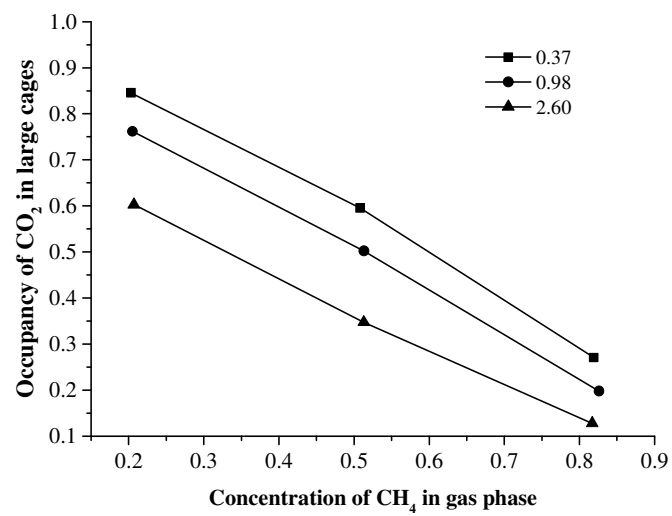

Figure S6. Variation of occupancy of CO<sub>2</sub> in large cages with the concentration of CH<sub>4</sub> in gas phase
